**Corrections**

*Characterization of the interaction of normal and mutant Rho-GAP with Rho family proteins*

By D. L. GRAHAM, J. F. ECCLESTON and P. N. LOWE

Volume 25 No. 3 (1997) 512S

In the legend to Figure 2, the symbols are incorrect and should read '● Rho-GAP Wild-type, ■ Rho-GAP R282A, ▲ Rho-GAP R282K'.

*Heparin sulphate in breast cancer cells*

By H. RAHMOUNE, J. E. TURNBULL, J. T. GALLAGHER, P. S. RUDLAND and D. G. FERNIG

Volume 24 No. 3 (1996) 355S

In Table 1, the rows for  $\Delta$ UA-GINSO3(6S),  $\Delta$ UA(2S)-GINSO3,  $\Delta$ UA(2S)-GINAc(S) and Total should read as follows:

|                          |       |      |      |      |      |      |
|--------------------------|-------|------|------|------|------|------|
| $\Delta$ UA-GINSO3(6S)   | 1.8   | 2.1  | 2.9  | 6.8  | 8.9  | 10.7 |
| $\Delta$ UA(2S)-GINSO3   | 11.1  | 9.6  | 10   | 13.1 | 9.6  | 14.1 |
| $\Delta$ UA(2S)-GINAc(S) | -     | -    | 0.6  | -    | -    | -    |
| Total                    | 100.9 | 97.3 | 95.5 | 98.1 | 97.3 | 100  |

*Axon outgrowth and neurofilament protein expression in mouse neuroblastoma cells exposed to the neurotoxin MPTP*

By L. A. DE GIROLAMO, A. J. HARGREAVES and E. E. BILLET

Volume 25 No. 4 (1997) S575

Figure 2(B) is upside-down; the correct Figure should appear as shown below.

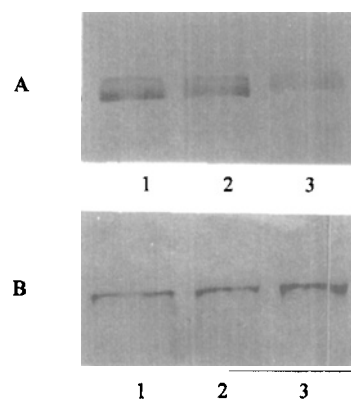

*The influence of allergy and smoking on the sulphation of nasal mucins*

By S. J. WOOD, M. A. BIRCHALL, T. IRIMURA and A. P. CORFIELD

Volume 25 No. 3 (1997) 506S

At the start of the fifth paragraph, 'Aliquots (50 ml)' should read 'Aliquots (50  $\mu$ l)'.
